# Supplementary material for: Development and Validation of Confirmatory Foot-and-Mouth Disease Virus Antibody ELISAs to Identify Infected Animals in Vaccinated Populations
Source: MDPI journal article supplement (doi:10.3390/v13050914), 2021-05-15
Supplement: s1 [file s1]

## Supplementary Information

**Supplementary Table S1.** Assessment of the diagnostic agreement between either the PrioCHECK® or IDvet FMDV NS ELISAs and the in-house ELISA tests for detecting infection and/or carrier status in unvaccinated, vaccinated, bovine NSP panel, and cattle field sera.  $\kappa$  = kappa statistic; PPA = positive agreement (%); NPA = negative agreement (%).

|                                        | Prionics |       |       | IDvet Long |       |       | IDvet Short |       |       |
|----------------------------------------|----------|-------|-------|------------|-------|-------|-------------|-------|-------|
|                                        | $\kappa$ | PPA   | NPA   | $\kappa$   | PPA   | NPA   | $\kappa$    | PPA   | NPA   |
| <i>Unvaccinated Infected Recovered</i> |          |       |       |            |       |       |             |       |       |
| 2B                                     | 0.87     | 88.68 | 99.19 | 0.82       | 88.68 | 99.19 | 0.85        | 90.38 | 99.19 |
| 3B                                     | 0.82     | 88.68 | 98.37 | 0.85       | 88.68 | 98.37 | 0.86        | 90.38 | 98.38 |
| 3ABC                                   | 0.87     | 88.68 | 99.19 | 0.82       | 88.68 | 99.19 | 0.87        | 90.38 | 99.19 |
| 3D                                     | 0.81     | 86.79 | 97.26 | 0.82       | 86.79 | 97.26 | 0.85        | 90.38 | 97.36 |
| 3CD                                    | 0.81     | 86.79 | 98.56 | 0.83       | 86.79 | 98.58 | 0.85        | 88.46 | 98.58 |
| 2C                                     | 0.17     | 75.47 | 76.85 | 0.12       | 73.58 | 76.75 | 0.13        | 75.00 | 76.77 |
| <i>Unvaccinated Carrier</i>            |          |       |       |            |       |       |             |       |       |
| 2B                                     | 0.86     | 78.57 | 99.19 | 0.87       | 78.57 | 99.19 | 0.88        | 81.48 | 99.19 |
| 3B                                     | 0.88     | 78.57 | 98.37 | 0.88       | 78.57 | 98.37 | 0.86        | 81.48 | 98.38 |
| 3ABC                                   | 0.86     | 78.57 | 99.19 | 0.87       | 78.57 | 99.19 | 0.88        | 81.48 | 99.19 |
| 3D                                     | 0.84     | 75.00 | 97.26 | 0.85       | 75.00 | 97.26 | 0.86        | 81.48 | 97.36 |
| 3CD                                    | 0.86     | 75.00 | 98.58 | 0.87       | 75.00 | 98.58 | 0.88        | 77.78 | 98.58 |
| 2C                                     | 0.06     | 57.14 | 76.85 | 0.06       | 53.57 | 76.75 | 0.07        | 55.55 | 76.77 |
| <i>Vaccinated Infected Recovered</i>   |          |       |       |            |       |       |             |       |       |
| 2B                                     | 0.74     | 67.58 | 98.85 | 0.77       | 73.30 | 98.11 | 0.76        | 72.86 | 98.57 |
| 3B                                     | 0.85     | 84.02 | 98.18 | 0.84       | 85.86 | 97.08 | 0.82        | 85.43 | 97.62 |
| 3ABC                                   | 0.77     | 69.86 | 99.14 | 0.79       | 75.92 | 98.49 | 0.79        | 74.37 | 98.76 |
| 3D                                     | 0.67     | 70.32 | 95.31 | 0.66       | 72.25 | 94.34 | 0.65        | 71.86 | 94.78 |
| 3CD                                    | 0.66     | 63.01 | 97.22 | 0.66       | 64.92 | 96.42 | 0.65        | 65.33 | 96.96 |
| 2C                                     | 0.18     | 47.03 | 77.01 | 0.19       | 49.21 | 76.72 | 0.22        | 49.25 | 76.92 |
| <i>Vaccinated Carrier</i>              |          |       |       |            |       |       |             |       |       |
| 2B                                     | 0.77     | 71.72 | 98.90 | 0.76       | 73.38 | 98.71 | 0.77        | 73.68 | 98.32 |
| 3B                                     | 0.81     | 79.31 | 98.20 | 0.81       | 82.73 | 98.21 | 0.83        | 82.71 | 97.73 |
| 3ABC                                   | 0.81     | 75.17 | 99.20 | 0.81       | 76.26 | 98.91 | 0.80        | 78.19 | 98.71 |
| 3D                                     | 0.64     | 62.76 | 97.00 | 0.63       | 64.03 | 96.82 | 0.64        | 64.66 | 96.54 |
| 3CD                                    | 0.64     | 57.93 | 98.30 | 0.62       | 58.99 | 98.11 | 0.64        | 58.65 | 97.73 |
| 2C                                     | 0.17     | 50.34 | 76.80 | 0.16       | 50.36 | 76.64 | 0.17        | 50.37 | 76.48 |
| <i>Panel</i>                           |          |       |       |            |       |       |             |       |       |
| 2B                                     | 0.77     | 79.49 | 98.99 | 0.76       | 79.49 | 98.99 | 0.76        | 81.08 | 98.89 |
| 3B                                     | 0.70     | 76.92 | 98.18 | 0.71       | 79.49 | 98.28 | 0.71        | 81.08 | 98.18 |
| 3ABC                                   | 0.68     | 64.10 | 99.09 | 0.72       | 66.67 | 99.19 | 0.70        | 70.27 | 99.19 |
| 3D                                     | 0.50     | 61.54 | 97.06 | 0.53       | 64.10 | 97.16 | 0.52        | 67.57 | 97.17 |
| 3CD                                    | 0.60     | 61.54 | 98.38 | 0.60       | 64.10 | 98.48 | 0.61        | 64.86 | 98.38 |
| 2C                                     | 0.10     | 64.10 | 76.82 | 0.08       | 56.41 | 76.52 | 0.09        | 56.76 | 76.46 |
| <i>Field</i>                           |          |       |       |            |       |       |             |       |       |
| 2B                                     | 0.93     | 93.21 | 99.05 | 0.93       | 92.73 | 99.19 | 0.92        | 94.37 | 98.99 |
| 3B                                     | 0.92     | 95.06 | 98.10 | 0.92       | 93.94 | 98.37 | 0.91        | 96.25 | 98.28 |
| 3ABC                                   | 0.94     | 93.83 | 98.95 | 0.94       | 92.73 | 99.19 | 0.92        | 95.62 | 99.19 |
| 3D                                     | 0.74     | 73.46 | 96.96 | 0.74       | 72.73 | 97.26 | 0.73        | 75.00 | 97.27 |
| 3CD                                    | 0.75     | 69.13 | 98.29 | 0.74       | 68.48 | 98.58 | 0.74        | 70.00 | 98.48 |
| 2C                                     | 0.37     | 80.25 | 75.78 | 0.37       | 78.79 | 76.75 | 0.37        | 80.62 | 76.77 |

**Supplementary Table S2.** Assessment of the diagnostic performance for a range of  $\pm 0.1$  cut-off points of each of the NSP tests, for the detection of infection and/or carrier status in unvaccinated, vaccinated, published NSP panel, and known clinically infected field sera from cattle. Se = sensitivity (%); Sp = specificity (%), LR+ = likelihood ratio test for positive results; LR- = likelihood ratio test for negative results.

|                                        | Test        | Cut-Off | Se     | Sp    | Classified | LR+    | LR-  |
|----------------------------------------|-------------|---------|--------|-------|------------|--------|------|
| <i>Unvaccinated Infected Recovered</i> | Prionics    | 40      | 100.00 | 94.85 | 95.09      | 19.43  | 0.00 |
|                                        |             | 45      | 100.00 | 98.08 | 98.17      | 52.16  | 0.00 |
|                                        |             | 50      | 100.00 | 99.39 | 99.42      | 165.17 | 0.00 |
|                                        |             | 55      | 100.00 | 99.60 | 99.61      | 247.75 | 0.00 |
|                                        |             | 60      | 100.00 | 99.80 | 99.81      | 495.51 | 0.00 |
|                                        | IDvet Long  | 40      | 100.00 | 98.59 | 98.65      | 70.79  | 0.00 |
|                                        |             | 45      | 100.00 | 98.69 | 98.75      | 76.23  | 0.00 |
|                                        |             | 50      | 100.00 | 99.29 | 99.33      | 141.57 | 0.00 |
|                                        |             | 55      | 100.00 | 99.50 | 99.52      | 198.20 | 0.00 |
|                                        |             | 60      | 100.00 | 99.70 | 99.71      | 330.33 | 0.00 |
|                                        | IDvet Short | 40      | 100.00 | 98.99 | 99.04      | 99.10  | 0.00 |
|                                        |             | 45      | 100.00 | 99.19 | 99.23      | 123.87 | 0.00 |
|                                        |             | 50      | 100.00 | 99.39 | 99.42      | 165.17 | 0.00 |
|                                        |             | 55      | 100.00 | 99.50 | 99.52      | 198.20 | 0.00 |
|                                        |             | 60      | 100.00 | 99.60 | 99.61      | 247.75 | 0.00 |
|                                        | 2B          | 0.4     | 100.00 | 96.97 | 97.11      | 33.03  | 0    |
|                                        |             | 0.45    | 100.00 | 98.08 | 98.17      | 52.16  | 0    |
|                                        |             | 0.5     | 100.00 | 99.09 | 99.13      | 110.11 | 0    |
|                                        |             | 0.55    | 95.74  | 99.60 | 99.42      | 237.21 | 0.04 |
|                                        |             | 0.6     | 93.62  | 99.70 | 99.42      | 309.25 | 0.06 |
|                                        | 3B          | 0.4     | 100.00 | 84.66 | 85.36      | 6.52   | 0.00 |
|                                        |             | 0.45    | 100.00 | 92.53 | 92.87      | 13.39  | 0.00 |
|                                        |             | 0.5     | 100.00 | 98.39 | 98.46      | 61.94  | 0.00 |
|                                        |             | 0.55    | 97.87  | 98.79 | 98.75      | 80.83  | 0.02 |
|                                        |             | 0.6     | 95.74  | 98.89 | 98.75      | 86.26  | 0.04 |
|                                        | 3ABC        | 0.4     | 100.00 | 96.27 | 96.44      | 26.78  | 0.00 |
|                                        |             | 0.45    | 100.00 | 98.18 | 98.27      | 55.06  | 0.00 |
|                                        |             | 0.5     | 100.00 | 99.09 | 99.13      | 110.11 | 0.00 |
|                                        |             | 0.55    | 93.62  | 99.19 | 98.94      | 115.97 | 0.06 |
|                                        |             | 0.6     | 89.36  | 99.29 | 98.84      | 126.51 | 0.11 |
|                                        | 3D          | 0.4     | 97.87  | 96.77 | 96.82      | 30.31  | 0.02 |
|                                        |             | 0.45    | 97.87  | 96.97 | 97.01      | 32.33  | 0.02 |
|                                        |             | 0.5     | 97.87  | 97.17 | 97.21      | 34.64  | 0.02 |
|                                        |             | 0.55    | 97.87  | 97.88 | 97.88      | 46.19  | 0.02 |
|                                        |             | 0.6     | 91.49  | 98.08 | 97.78      | 47.72  | 0.09 |
|                                        | 3CD         | 0.4     | 97.87  | 98.08 | 98.07      | 51.05  | 0.02 |
|                                        |             | 0.45    | 97.87  | 98.28 | 98.27      | 57.05  | 0.02 |
|                                        |             | 0.5     | 97.87  | 98.49 | 98.46      | 64.66  | 0.02 |
|                                        |             | 0.55    | 93.62  | 98.89 | 98.65      | 84.34  | 0.06 |
|                                        |             | 0.6     | 91.49  | 99.29 | 98.94      | 129.52 | 0.09 |
|                                        | 2C          | 0.4     | 87.23  | 65.29 | 66.28      | 2.51   | 0.20 |
|                                        |             | 0.45    | 82.98  | 71.95 | 72.45      | 2.96   | 0.24 |
|                                        |             | 0.5     | 82.98  | 76.69 | 76.97      | 3.56   | 0.22 |
|                                        |             | 0.55    | 78.72  | 80.52 | 80.44      | 4.04   | 0.26 |
|                                        |             | 0.6     | 76.60  | 83.96 | 83.62      | 4.77   | 0.28 |
| <i>Unvaccinated Carrier</i>            | Prionics    | 40      | 100.00 | 94.85 | 94.97      | 19.43  | 0.00 |
|                                        |             | 45      | 100.00 | 98.08 | 98.12      | 52.16  | 0.00 |
|                                        |             | 50      | 100.00 | 99.39 | 99.41      | 165.17 | 0.00 |
|                                        |             | 55      | 100.00 | 99.60 | 99.61      | 247.75 | 0.00 |
|                                        |             | 60      | 100.00 | 99.80 | 99.80      | 495.51 | 0.00 |

|                                      |             |      |        |       |       |        |      |
|--------------------------------------|-------------|------|--------|-------|-------|--------|------|
|                                      | IDvet Long  | 40   | 100.00 | 98.59 | 98.62 | 70.79  | 0.00 |
|                                      |             | 45   | 100.00 | 98.69 | 98.72 | 76.23  | 0.00 |
|                                      |             | 50   | 100.00 | 99.29 | 99.31 | 141.57 | 0.00 |
|                                      |             | 55   | 100.00 | 99.50 | 99.51 | 198.20 | 0.00 |
|                                      |             | 60   | 100.00 | 99.70 | 99.70 | 330.33 | 0.00 |
|                                      | IDvet Short | 40   | 100.00 | 98.99 | 99.01 | 99.10  | 0.00 |
|                                      |             | 45   | 100.00 | 99.19 | 99.21 | 123.87 | 0.00 |
|                                      |             | 50   | 100.00 | 99.39 | 99.41 | 165.17 | 0.00 |
|                                      |             | 55   | 100.00 | 99.50 | 99.51 | 198.20 | 0.00 |
|                                      |             | 60   | 100.00 | 99.60 | 99.61 | 247.75 | 0.00 |
|                                      | 2B          | 0.4  | 100.00 | 96.97 | 97.04 | 33.03  | 0.00 |
|                                      |             | 0.45 | 100.00 | 98.59 | 98.62 | 70.79  | 0.00 |
|                                      |             | 0.5  | 100.00 | 99.09 | 99.11 | 110.11 | 0.00 |
|                                      |             | 0.55 | 90.91  | 99.60 | 99.41 | 225.23 | 0.09 |
|                                      |             | 0.6  | 86.36  | 99.70 | 99.41 | 285.29 | 0.14 |
|                                      | 3B          | 0.4  | 100.00 | 84.66 | 85.00 | 6.52   | 0.00 |
|                                      |             | 0.45 | 100.00 | 92.53 | 92.69 | 13.39  | 0.00 |
|                                      |             | 0.5  | 100.00 | 98.39 | 98.42 | 61.94  | 0.00 |
|                                      |             | 0.55 | 100.00 | 98.79 | 98.82 | 82.58  | 0.00 |
|                                      |             | 0.6  | 95.45  | 98.79 | 98.72 | 78.83  | 0.05 |
|                                      | 3ABC        | 0.4  | 100.00 | 96.27 | 96.35 | 26.78  | 0.00 |
|                                      |             | 0.45 | 100.00 | 98.18 | 98.22 | 55.06  | 0.00 |
|                                      |             | 0.5  | 100.00 | 99.09 | 99.11 | 110.11 | 0.00 |
|                                      |             | 0.55 | 90.91  | 99.19 | 99.01 | 112.61 | 0.09 |
|                                      |             | 0.6  | 86.36  | 99.29 | 99.01 | 122.27 | 0.14 |
|                                      | 3D          | 0.4  | 95.45  | 96.77 | 96.74 | 29.56  | 0.05 |
|                                      |             | 0.45 | 95.45  | 96.97 | 96.94 | 31.53  | 0.05 |
|                                      |             | 0.5  | 95.45  | 97.17 | 97.14 | 33.78  | 0.05 |
|                                      |             | 0.55 | 95.45  | 97.88 | 97.83 | 45.05  | 0.05 |
|                                      |             | 0.6  | 86.36  | 97.98 | 97.73 | 42.79  | 0.14 |
|                                      | 3CD         | 0.4  | 95.45  | 98.08 | 98.03 | 49.79  | 0.05 |
|                                      |             | 0.45 | 95.45  | 98.28 | 98.22 | 55.64  | 0.05 |
|                                      |             | 0.5  | 95.45  | 98.49 | 98.42 | 63.06  | 0.05 |
|                                      |             | 0.55 | 90.91  | 98.89 | 98.72 | 81.90  | 0.09 |
|                                      |             | 0.6  | 90.91  | 99.19 | 99.01 | 112.61 | 0.09 |
|                                      | 2C          | 0.4  | 77.27  | 65.29 | 65.55 | 2.23   | 0.35 |
|                                      |             | 0.45 | 68.18  | 71.95 | 71.87 | 2.43   | 0.44 |
|                                      |             | 0.5  | 68.18  | 76.69 | 76.51 | 2.93   | 0.41 |
|                                      |             | 0.55 | 59.09  | 80.52 | 80.06 | 3.03   | 0.51 |
|                                      |             | 0.6  | 59.09  | 83.96 | 83.42 | 3.68   | 0.49 |
| <i>Vaccinated Infected Recovered</i> | Prionics    | 40   | 85.83  | 94.83 | 93.05 | 16.59  | 0.15 |
|                                      |             | 45   | 84.21  | 98.11 | 95.37 | 44.54  | 0.16 |
|                                      |             | 50   | 82.59  | 99.40 | 96.09 | 138.34 | 0.18 |
|                                      |             | 55   | 82.19  | 99.80 | 96.33 | 412.99 | 0.18 |
|                                      |             | 60   | 80.16  | 99.90 | 96.01 | 805.63 | 0.20 |
|                                      | IDvet Long  | 40   | 79.76  | 98.51 | 94.81 | 53.44  | 0.21 |
|                                      |             | 45   | 76.92  | 98.61 | 94.33 | 55.22  | 0.23 |
|                                      |             | 50   | 74.90  | 99.20 | 94.41 | 94.09  | 0.25 |
|                                      |             | 55   | 72.87  | 99.40 | 94.17 | 122.06 | 0.27 |
|                                      |             | 60   | 70.04  | 99.60 | 93.77 | 175.98 | 0.30 |
|                                      | IDvet Short | 40   | 82.59  | 98.81 | 95.61 | 69.17  | 0.18 |
|                                      |             | 45   | 80.16  | 99.10 | 95.37 | 89.51  | 0.20 |
|                                      |             | 50   | 77.73  | 99.30 | 95.05 | 111.60 | 0.22 |
|                                      |             | 55   | 74.90  | 99.40 | 94.57 | 125.46 | 0.25 |
|                                      |             | 60   | 72.47  | 99.60 | 94.25 | 182.08 | 0.28 |
|                                      | 2B          | 0.4  | 67.21  | 97.01 | 91.13 | 22.51  | 0.34 |
|                                      |             | 0.45 | 63.56  | 98.01 | 91.21 | 31.94  | 0.37 |
|                                      |             | 0.5  | 61.54  | 99.10 | 91.69 | 68.72  | 0.39 |
|                                      |             | 0.55 | 55.87  | 99.40 | 90.81 | 93.58  | 0.44 |
|                                      |             | 0.6  | 48.58  | 99.60 | 89.54 | 122.06 | 0.52 |
|                                      | 3B          | 0.4  | 80.97  | 84.68 | 83.95 | 5.28   | 0.22 |
|                                      |             | 0.45 | 77.73  | 92.54 | 89.62 | 10.42  | 0.24 |
|                                      |             | 0.5  | 72.47  | 98.41 | 93.29 | 45.52  | 0.28 |
|                                      |             | 0.55 | 70.45  | 98.81 | 93.21 | 59.00  | 0.30 |
|                                      |             | 0.6  | 65.18  | 98.91 | 92.25 | 59.55  | 0.35 |

|                           |             |      |       |       |       |        |      |
|---------------------------|-------------|------|-------|-------|-------|--------|------|
| <i>Vaccinated Carrier</i> | 3ABC        | 0.4  | 65.18 | 96.22 | 90.10 | 17.24  | 0.36 |
|                           |             | 0.45 | 62.75 | 98.21 | 91.21 | 35.04  | 0.38 |
|                           |             | 0.5  | 61.54 | 99.00 | 91.61 | 61.85  | 0.39 |
|                           |             | 0.55 | 57.09 | 99.20 | 90.89 | 71.71  | 0.43 |
|                           |             | 0.6  | 51.42 | 99.20 | 89.78 | 64.59  | 0.49 |
|                           | 3D          | 0.4  | 70.04 | 96.22 | 91.05 | 18.52  | 0.31 |
|                           |             | 0.45 | 68.83 | 96.52 | 91.05 | 19.76  | 0.32 |
|                           |             | 0.5  | 66.80 | 96.62 | 90.73 | 19.75  | 0.34 |
|                           |             | 0.55 | 62.75 | 97.51 | 90.65 | 25.23  | 0.38 |
|                           |             | 0.6  | 57.49 | 97.61 | 89.70 | 24.07  | 0.44 |
|                           | 3CD         | 0.4  | 61.54 | 97.51 | 90.42 | 24.74  | 0.39 |
|                           |             | 0.45 | 59.92 | 97.61 | 90.18 | 25.09  | 0.41 |
|                           |             | 0.5  | 57.89 | 98.11 | 90.18 | 30.62  | 0.43 |
|                           |             | 0.55 | 52.23 | 98.51 | 89.38 | 34.99  | 0.49 |
|                           |             | 0.6  | 49.80 | 98.81 | 89.14 | 41.71  | 0.51 |
|                           | 2C          | 0.4  | 55.06 | 65.47 | 63.42 | 1.59   | 0.69 |
|                           |             | 0.45 | 50.20 | 72.04 | 67.73 | 1.80   | 0.69 |
|                           |             | 0.5  | 44.13 | 76.92 | 70.45 | 1.91   | 0.73 |
|                           |             | 0.55 | 35.22 | 80.60 | 71.65 | 1.82   | 0.80 |
|                           |             | 0.6  | 30.36 | 83.98 | 73.40 | 1.90   | 0.83 |
|                           | Prionics    | 40   | 92.86 | 94.85 | 94.59 | 18.04  | 0.08 |
|                           |             | 45   | 90.91 | 98.08 | 97.12 | 47.42  | 0.09 |
|                           |             | 50   | 90.26 | 99.39 | 98.17 | 149.08 | 0.10 |
|                           |             | 55   | 90.26 | 99.80 | 98.52 | 447.25 | 0.10 |
|                           |             | 60   | 88.31 | 99.90 | 98.34 | 875.12 | 0.12 |
|                           | IDvet Long  | 40   | 90.26 | 98.59 | 97.47 | 63.89  | 0.10 |
|                           |             | 45   | 88.96 | 98.79 | 97.47 | 73.47  | 0.11 |
|                           |             | 50   | 86.36 | 99.29 | 97.55 | 122.27 | 0.14 |
|                           |             | 55   | 83.77 | 99.60 | 97.47 | 207.53 | 0.16 |
|                           |             | 60   | 80.52 | 99.80 | 97.21 | 398.98 | 0.20 |
|                           | IDvet Short | 40   | 88.96 | 98.99 | 97.64 | 88.16  | 0.11 |
|                           |             | 45   | 87.01 | 99.29 | 97.64 | 123.19 | 0.13 |
|                           |             | 50   | 83.77 | 99.50 | 97.38 | 166.03 | 0.16 |
|                           |             | 55   | 81.82 | 99.60 | 97.21 | 202.70 | 0.18 |
|                           |             | 60   | 77.92 | 99.70 | 96.77 | 257.40 | 0.22 |
|                           | 2B          | 0.4  | 75.32 | 97.07 | 94.15 | 25.74  | 0.25 |
|                           |             | 0.45 | 72.08 | 98.08 | 94.59 | 37.59  | 0.28 |
|                           |             | 0.5  | 70.13 | 99.19 | 95.28 | 86.87  | 0.30 |
|                           |             | 0.55 | 66.23 | 99.50 | 95.02 | 131.28 | 0.34 |
|                           |             | 0.6  | 57.79 | 99.70 | 94.06 | 190.91 | 0.42 |
|                           | 3B          | 0.4  | 83.77 | 84.66 | 84.54 | 5.46   | 0.19 |
|                           |             | 0.45 | 81.82 | 92.53 | 91.09 | 10.96  | 0.20 |
|                           |             | 0.5  | 75.97 | 98.39 | 95.37 | 47.06  | 0.24 |
|                           |             | 0.55 | 74.03 | 98.79 | 95.46 | 61.13  | 0.26 |
|                           |             | 0.6  | 66.23 | 98.89 | 94.50 | 59.67  | 0.34 |
|                           | 3ABC        | 0.4  | 73.38 | 96.27 | 93.19 | 19.65  | 0.28 |
|                           |             | 0.45 | 71.43 | 98.18 | 94.59 | 39.33  | 0.29 |
|                           |             | 0.5  | 70.78 | 99.09 | 95.28 | 77.94  | 0.29 |
|                           |             | 0.55 | 64.94 | 99.29 | 94.67 | 91.93  | 0.35 |
|                           |             | 0.6  | 59.09 | 99.29 | 93.89 | 83.66  | 0.41 |
|                           | 3D          | 0.4  | 63.64 | 96.77 | 92.31 | 19.71  | 0.38 |
|                           |             | 0.45 | 62.34 | 97.07 | 92.40 | 21.30  | 0.39 |
|                           |             | 0.5  | 61.04 | 97.17 | 92.31 | 21.60  | 0.40 |
|                           |             | 0.55 | 57.79 | 97.98 | 92.58 | 28.64  | 0.43 |
|                           |             | 0.6  | 53.90 | 98.08 | 92.14 | 28.11  | 0.47 |
|                           | 3CD         | 0.4  | 59.74 | 98.08 | 92.93 | 31.16  | 0.41 |
|                           |             | 0.45 | 59.09 | 98.28 | 93.01 | 34.45  | 0.42 |
|                           |             | 0.5  | 56.49 | 98.59 | 92.93 | 39.99  | 0.44 |
|                           |             | 0.55 | 49.35 | 98.99 | 92.31 | 48.91  | 0.51 |
|                           |             | 0.6  | 46.10 | 99.19 | 92.05 | 57.11  | 0.54 |
|                           | 2C          | 0.4  | 63.64 | 65.29 | 65.07 | 1.83   | 0.56 |
|                           |             | 0.45 | 57.14 | 71.95 | 69.96 | 2.04   | 0.60 |
|                           |             | 0.5  | 49.35 | 76.89 | 73.19 | 2.14   | 0.66 |
|                           |             | 0.55 | 40.26 | 80.52 | 75.11 | 2.07   | 0.74 |
|                           |             | 0.6  | 35.71 | 83.96 | 77.47 | 2.23   | 0.77 |

|              |             |      |        |       |       |        |      |
|--------------|-------------|------|--------|-------|-------|--------|------|
| <i>Panel</i> | Prionics    | 40   | 94.44  | 94.85 | 94.84 | 18.35  | 0.06 |
|              |             | 45   | 94.44  | 98.08 | 97.96 | 49.26  | 0.06 |
|              |             | 50   | 91.67  | 99.39 | 99.12 | 151.40 | 0.08 |
|              |             | 55   | 91.67  | 99.60 | 99.32 | 227.10 | 0.08 |
|              |             | 60   | 86.11  | 99.80 | 99.32 | 426.69 | 0.14 |
|              | IDvet Long  | 40   | 100.00 | 98.59 | 98.64 | 70.79  | 0.00 |
|              |             | 45   | 100.00 | 98.79 | 98.83 | 82.58  | 0.00 |
|              |             | 50   | 91.67  | 99.29 | 99.03 | 129.77 | 0.08 |
|              |             | 55   | 91.67  | 99.50 | 99.22 | 181.68 | 0.08 |
|              |             | 60   | 86.11  | 99.80 | 99.32 | 426.69 | 0.14 |
|              | IDvet Short | 40   | 94.44  | 98.99 | 98.83 | 93.59  | 0.06 |
|              |             | 45   | 94.44  | 99.19 | 99.03 | 116.99 | 0.06 |
|              |             | 50   | 91.67  | 99.50 | 99.22 | 181.68 | 0.08 |
|              |             | 55   | 88.89  | 99.50 | 99.12 | 176.18 | 0.11 |
|              |             | 60   | 86.11  | 99.60 | 99.12 | 213.34 | 0.14 |
|              | 2B          | 0.4  | 97.22  | 96.97 | 96.98 | 32.12  | 0.03 |
|              |             | 0.45 | 94.44  | 98.08 | 97.96 | 49.26  | 0.06 |
|              |             | 0.5  | 94.44  | 99.09 | 98.93 | 103.99 | 0.06 |
|              |             | 0.55 | 75.00  | 99.50 | 98.64 | 148.65 | 0.25 |
|              |             | 0.6  | 69.44  | 99.70 | 98.64 | 229.40 | 0.31 |
|              | 3B          | 0.4  | 94.44  | 84.66 | 85.00 | 6.16   | 0.07 |
|              |             | 0.45 | 94.44  | 92.53 | 92.60 | 12.65  | 0.06 |
|              |             | 0.5  | 88.89  | 98.39 | 98.05 | 55.06  | 0.11 |
|              |             | 0.55 | 88.89  | 98.79 | 98.44 | 73.41  | 0.11 |
|              |             | 0.6  | 86.11  | 98.79 | 98.34 | 71.11  | 0.14 |
|              | 3ABC        | 0.4  | 86.11  | 96.27 | 95.91 | 23.06  | 0.14 |
|              |             | 0.45 | 75.00  | 98.18 | 97.37 | 41.29  | 0.25 |
|              |             | 0.5  | 75.00  | 99.19 | 98.34 | 92.91  | 0.25 |
|              |             | 0.55 | 69.44  | 99.29 | 98.25 | 98.31  | 0.31 |
|              |             | 0.6  | 66.67  | 99.29 | 98.15 | 94.38  | 0.34 |
|              | 3D          | 0.4  | 80.56  | 96.87 | 96.30 | 25.75  | 0.20 |
|              |             | 0.45 | 72.22  | 96.97 | 96.11 | 23.86  | 0.29 |
|              |             | 0.5  | 72.22  | 97.17 | 96.30 | 25.56  | 0.29 |
|              |             | 0.55 | 69.44  | 97.88 | 96.88 | 32.77  | 0.31 |
|              |             | 0.6  | 66.67  | 97.98 | 96.88 | 33.03  | 0.34 |
|              | 3CD         | 0.4  | 75.00  | 98.08 | 97.27 | 39.12  | 0.25 |
|              |             | 0.45 | 75.00  | 98.28 | 97.47 | 43.72  | 0.25 |
|              |             | 0.5  | 72.22  | 98.49 | 97.57 | 47.71  | 0.28 |
|              |             | 0.55 | 58.33  | 98.89 | 97.47 | 52.55  | 0.42 |
|              |             | 0.6  | 50.00  | 99.29 | 97.57 | 70.79  | 0.50 |
|              | 2C          | 0.4  | 72.22  | 65.29 | 65.53 | 2.08   | 0.43 |
|              |             | 0.45 | 72.22  | 71.95 | 71.96 | 2.57   | 0.39 |
|              |             | 0.5  | 69.44  | 76.69 | 76.44 | 2.98   | 0.40 |
|              |             | 0.55 | 63.89  | 80.52 | 79.94 | 3.28   | 0.45 |
|              |             | 0.6  | 61.11  | 83.96 | 83.15 | 3.81   | 0.46 |
| <i>Field</i> | Prionics    | 40   | 97.48  | 94.85 | 95.22 | 18.94  | 0.03 |
|              |             | 45   | 97.48  | 98.08 | 98.00 | 50.85  | 0.03 |
|              |             | 50   | 96.86  | 99.39 | 99.04 | 159.97 | 0.03 |
|              |             | 55   | 96.86  | 99.60 | 99.22 | 239.96 | 0.03 |
|              |             | 60   | 96.86  | 99.80 | 99.39 | 479.93 | 0.03 |
|              | IDvet Long  | 40   | 100.00 | 98.59 | 98.78 | 70.79  | 0.00 |
|              |             | 45   | 100.00 | 98.69 | 98.87 | 76.23  | 0.00 |
|              |             | 50   | 100.00 | 99.29 | 99.39 | 141.57 | 0.00 |
|              |             | 55   | 100.00 | 99.50 | 99.57 | 198.20 | 0.00 |
|              |             | 60   | 100.00 | 99.70 | 99.74 | 330.33 | 0.00 |
|              | IDvet Short | 40   | 98.11  | 98.99 | 98.87 | 97.23  | 0.02 |
|              |             | 45   | 98.11  | 99.29 | 99.13 | 138.90 | 0.02 |
|              |             | 50   | 97.48  | 99.39 | 99.13 | 161.01 | 0.03 |
|              |             | 55   | 97.48  | 99.50 | 99.22 | 193.21 | 0.03 |
|              |             | 60   | 96.86  | 99.60 | 99.22 | 239.96 | 0.03 |
|              | 2B          | 0.4  | 98.11  | 96.97 | 97.13 | 32.41  | 0.02 |
|              |             | 0.45 | 96.23  | 98.08 | 97.83 | 50.19  | 0.04 |
|              |             | 0.5  | 96.23  | 99.09 | 98.70 | 105.96 | 0.04 |
|              |             | 0.55 | 93.71  | 99.50 | 98.70 | 185.74 | 0.06 |
|              |             | 0.6  | 91.82  | 99.70 | 98.61 | 303.32 | 0.08 |

|      |      |       |       |       |        |      |
|------|------|-------|-------|-------|--------|------|
| 3B   | 0.4  | 98.11 | 84.66 | 86.52 | 6.40   | 0.02 |
|      | 0.45 | 97.48 | 92.53 | 93.22 | 13.06  | 0.03 |
|      | 0.5  | 97.48 | 98.39 | 98.26 | 60.38  | 0.03 |
|      | 0.55 | 96.86 | 98.69 | 98.43 | 73.83  | 0.03 |
|      | 0.6  | 94.97 | 98.89 | 98.35 | 85.56  | 0.05 |
| 3ABC | 0.4  | 96.86 | 96.27 | 96.35 | 25.94  | 0.03 |
|      | 0.45 | 96.23 | 98.18 | 97.91 | 52.98  | 0.04 |
|      | 0.5  | 96.23 | 99.09 | 98.70 | 105.96 | 0.04 |
|      | 0.55 | 96.23 | 99.19 | 98.78 | 119.20 | 0.04 |
|      | 0.6  | 96.23 | 99.29 | 98.87 | 136.23 | 0.04 |
| 3D   | 0.4  | 77.36 | 96.77 | 94.09 | 23.96  | 0.23 |
|      | 0.45 | 76.73 | 97.07 | 94.26 | 26.22  | 0.24 |
|      | 0.5  | 75.47 | 97.17 | 94.17 | 26.71  | 0.25 |
|      | 0.55 | 69.18 | 97.88 | 93.91 | 32.65  | 0.31 |
|      | 0.6  | 63.52 | 98.08 | 93.30 | 33.13  | 0.37 |
| 3CD  | 0.4  | 76.73 | 98.08 | 95.13 | 40.02  | 0.24 |
|      | 0.45 | 73.58 | 98.39 | 94.96 | 45.58  | 0.27 |
|      | 0.5  | 71.07 | 98.49 | 94.70 | 46.95  | 0.29 |
|      | 0.55 | 58.49 | 98.99 | 93.39 | 57.96  | 0.42 |
|      | 0.6  | 50.31 | 99.29 | 92.52 | 71.23  | 0.50 |
| 2C   | 0.4  | 88.68 | 65.29 | 68.52 | 2.55   | 0.17 |
|      | 0.45 | 84.28 | 71.95 | 73.65 | 3.00   | 0.22 |
|      | 0.5  | 81.76 | 76.69 | 77.39 | 3.51   | 0.24 |
|      | 0.55 | 76.73 | 80.52 | 80.00 | 3.94   | 0.29 |
|      | 0.6  | 74.21 | 83.96 | 82.61 | 4.63   | 0.31 |
